# Supplementary material for: Simultaneous Analysis of Bergapten and Schinifoline in Zanthoxylum schinifolium Seeds Using HPLC and UPLC-MS/MS Systems
Source: MDPI journal article supplement (doi:10.3390/foods12071355), 2023-03-23
Supplement: s1 [file s1]

**Table S1**

Chromatographic parameters for simultaneous quantitation of the two markers in *Z. schinifolium* seeds by HPLC–PDA.

| Chromatographic parameter |                                                                                                                 |
|---------------------------|-----------------------------------------------------------------------------------------------------------------|
| Analytical column         | XBridge reverse-phase C <sub>18</sub> (250 mm length × 4.6 mm ID, 5 µm particle size)                           |
| Detector                  | PDA <sup>1</sup> (235 and 310 nm)                                                                               |
| Flow rate                 | 1.0 mL/min                                                                                                      |
| Injection volume          | 10.0 µL                                                                                                         |
| Column temperature        | 40.0 °C                                                                                                         |
| Mobile phase              | 1.0% (v/v) distilled water solution of acetic acid : 1.0% (v/v) solution of acetic acid in acetonitrile (1 : 1) |

<sup>1</sup>PDA: photo-diode array

**Table S2**

Repeatability of retention time and peak area of the two markers ( $n = 6$ ).

| No.     | Retention time (min) |              | Peak area (mAU) |               |
|---------|----------------------|--------------|-----------------|---------------|
|         | Bergapten            | Schinifoline | Bergapten       | Schinifoline  |
| 1       | 5.631                | 8.149        | 2,409,851       | 1,395,099     |
| 2       | 5.628                | 8.146        | 2,412,426       | 1,396,535     |
| 3       | 5.633                | 8.151        | 2,410,016       | 1,395,809     |
| 4       | 5.629                | 8.146        | 2,404,693       | 1,391,498     |
| 5       | 5.637                | 8.152        | 2,401,711       | 1,391,360     |
| 6       | 5.634                | 8.150        | 2,400,370       | 1,390,291     |
| Mean    | 5.632                | 8.149        | 2,406,511.167   | 1,393,432.000 |
| SD      | 0.003                | 0.003        | 4,949.441       | 2,681.680     |
| RSD (%) | 0.059                | 0.031        | 0.206           | 0.192         |

The concentration of the analyzed standard solution was both 50  $\mu\text{g/mL}$ .

**Table S3**

Stability (%) of the two markers measured at room temperature and under refrigeration using standard and sample solutions.

| Day     | Standard solution <sup>1</sup> |              |                            |              | Sample solution <sup>2</sup> |              |               |              |
|---------|--------------------------------|--------------|----------------------------|--------------|------------------------------|--------------|---------------|--------------|
|         | Room temperature <sup>3</sup>  |              | Refrigeration <sup>4</sup> |              | Room temperature             |              | Refrigeration |              |
|         | Bergapten                      | Schinifoline | Bergapten                  | Schinifoline | Bergapten                    | Schinifoline | Bergapten     | Schinifoline |
| 0       | 100.00                         | 100.00       | 100.00                     | 100.00       | 100.00                       | 100.00       | 100.00        | 100.00       |
| 1       | 99.82                          | 100.09       | 99.21                      | 99.44        | 99.54                        | 99.55        | 100.34        | 98.37        |
| 2       | 102.13                         | 102.42       | 98.51                      | 98.40        | 99.33                        | 99.24        | 100.29        | 98.26        |
| 3       | 100.05                         | 99.69        | 98.30                      | 100.21       | 99.52                        | 99.84        | 100.30        | 98.38        |
| 4       | 99.81                          | 101.05       | 100.49                     | 100.63       | 98.69                        | 99.02        | 100.19        | 98.36        |
| 7       | 102.72                         | 102.55       | 101.49                     | 101.32       | 97.58                        | 99.79        | 100.17        | 98.19        |
| 10      | 97.98                          | 98.59        | 102.95                     | 103.39       | 97.65                        | 99.75        | 100.03        | 98.13        |
| Mean    | 100.19                         | 100.43       | 99.95                      | 100.31       | 98.90                        | 99.60        | 100.19        | 98.53        |
| SD      | 1.55                           | 1.46         | 1.63                       | 1.54         | 0.96                         | 0.35         | 0.13          | 0.66         |
| RSD (%) | 1.55                           | 1.46         | 1.63                       | 1.53         | 0.97                         | 0.35         | 0.13          | 0.67         |

<sup>1</sup> Concentration of standard solution was 6.25 µg/mL (bergapten) and 1.25 µg/mL (schinifoline). <sup>2</sup> Concentration of sample solution was 10.0 mg/mL. <sup>3</sup> Room temperature: 23 ± 1 °C. <sup>4</sup> Refrigeration: approximately 4 °C.

**Table S4**

Parameters for simultaneous quantitation of the two markers in *Z. schinifolium* seeds by the UPLC–MS/MS MRM method.

| UPLC conditions  |                                                                              | MS conditions        |                           |
|------------------|------------------------------------------------------------------------------|----------------------|---------------------------|
| UPLC system      | Acquity UPLC I-Class                                                         | MS detector          | TQD <sup>1</sup>          |
| Column           | Acquity UPLC BEH C <sub>18</sub> analytical column (2.1 mm × 100 mm, 1.7 μm) | MS software          | MassLynx v4.2             |
| Column temp.     | 45 °C                                                                        | Ion source           | ESI <sup>2</sup> positive |
| Sample temp.     | 5 °C                                                                         | Acquisition mode     | MRM <sup>3</sup>          |
| Injection volume | 2.0 μL                                                                       | Capillary voltage    | 3.0 kV                    |
| Flow rate        | 0.3 mL/min                                                                   | Cone gas flow        | 50 L/h                    |
| Mobile phase A   | 0.1% (v/v) formic acid in distilled water                                    | Desolvation gas flow | 500 L/h                   |
| Mobile phase B   | Acetonitrile                                                                 | Desolvation temp.    | 300 °C                    |
| Gradient         | Time (min)                                                                   | A (%)                | B (%)                     |
|                  | Initial                                                                      | 80                   | 20                        |
|                  | 0.1                                                                          | 80                   | 20                        |
|                  | 14.0                                                                         | 5                    | 95                        |
|                  | 15.0                                                                         | 0                    | 100                       |
|                  | 15.1                                                                         | 80                   | 20                        |
|                  | 18.0                                                                         | 80                   | 20                        |

<sup>1</sup> TQD: triple quadrupole detector. <sup>2</sup> ESI: electrospray ionization. <sup>3</sup> MRM: multiple reaction monitoring.

**(A)**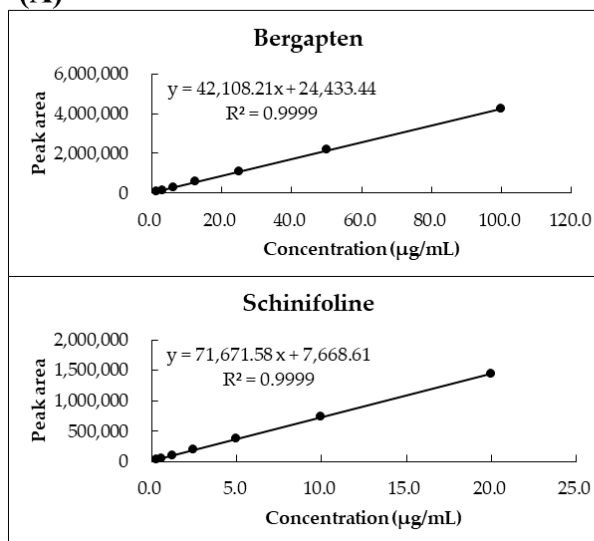**(B)**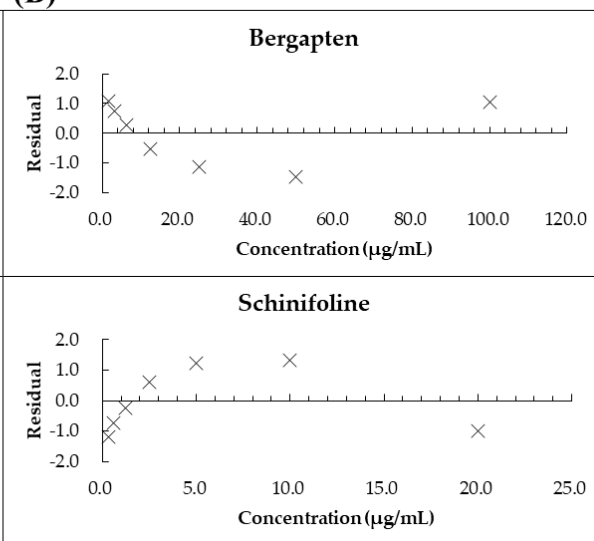

**Figure S1.** Calibration curves (A) and residual plots (B) for evaluating the linearity of the two marker substances in HPLC–PDA method.

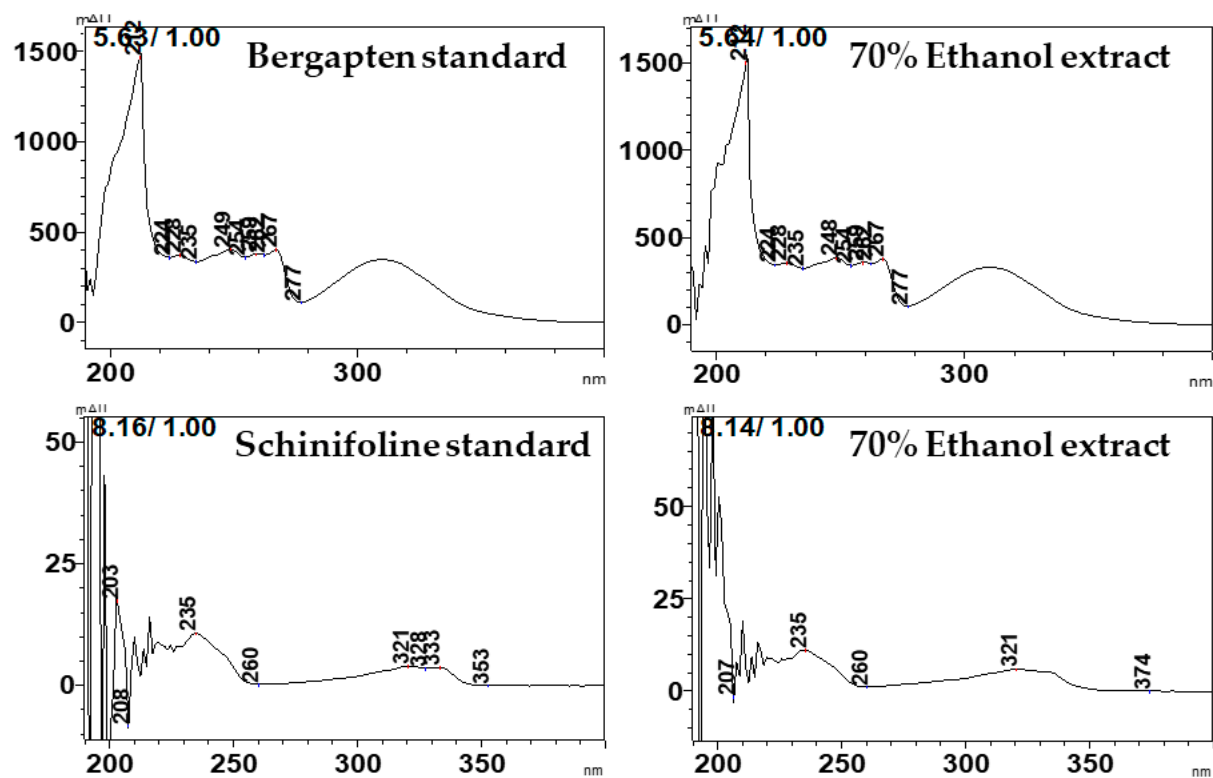

Figure S2. Validation of selectivity through UV spectra comparison.

# Bergapten

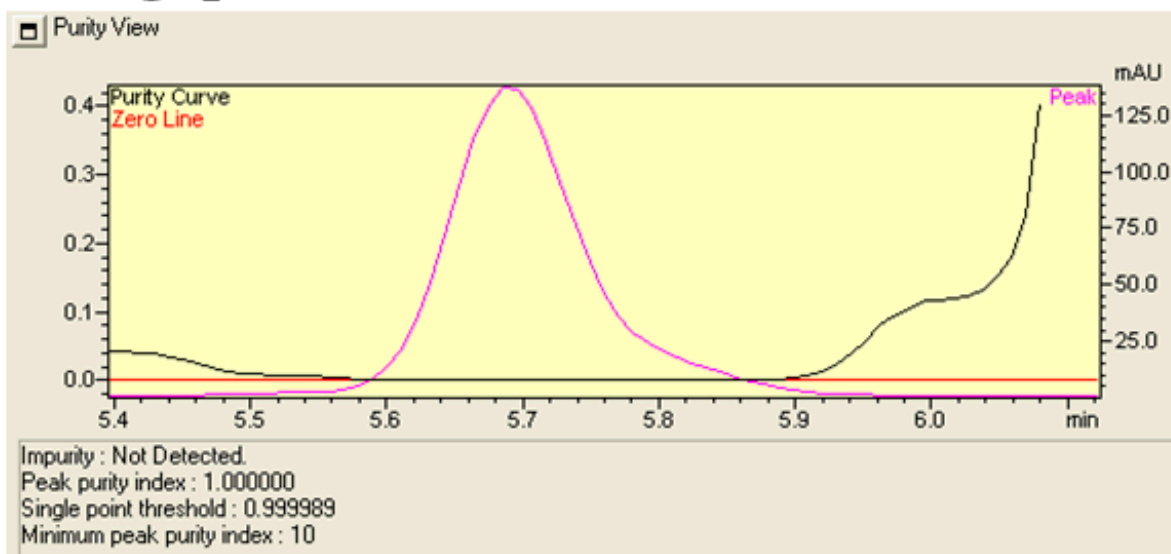

# Schinifoline

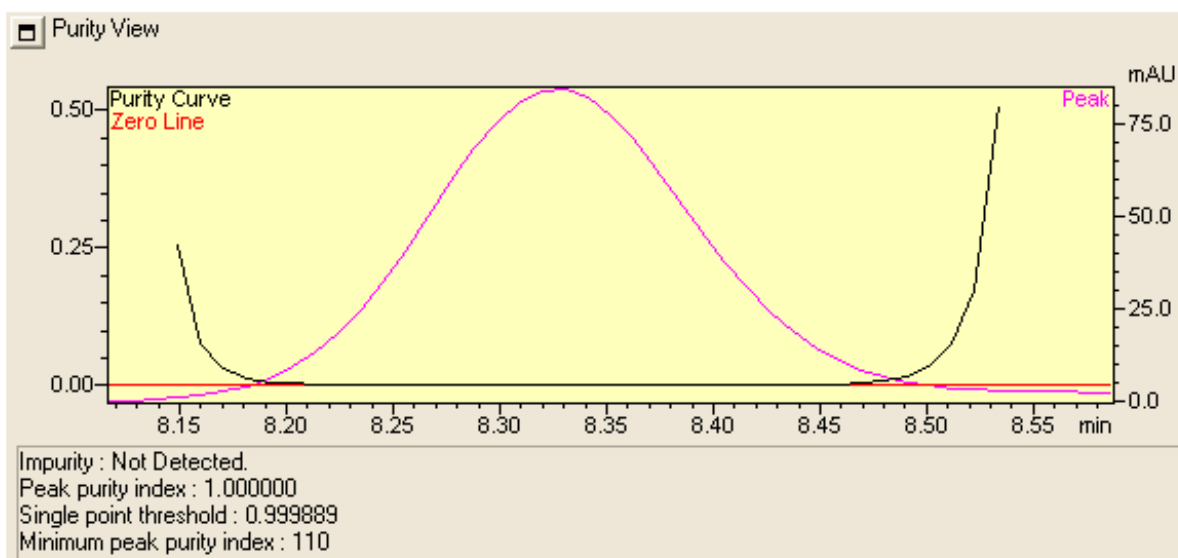

**Figure S3.** Peak purity evaluation to demonstrate the selectivity of two components in a sample.

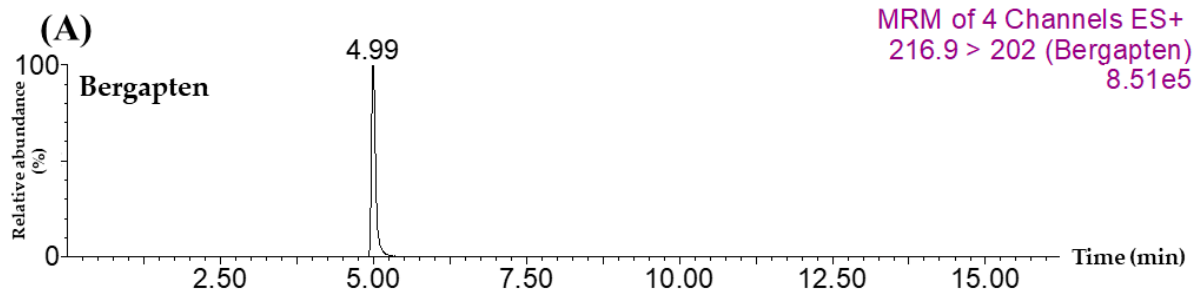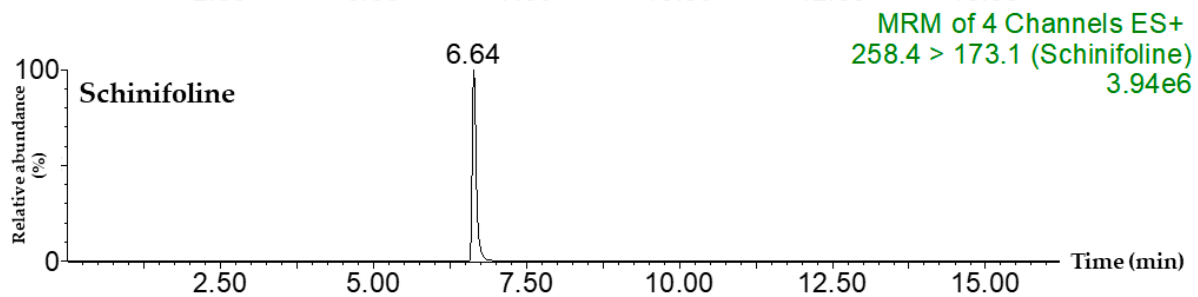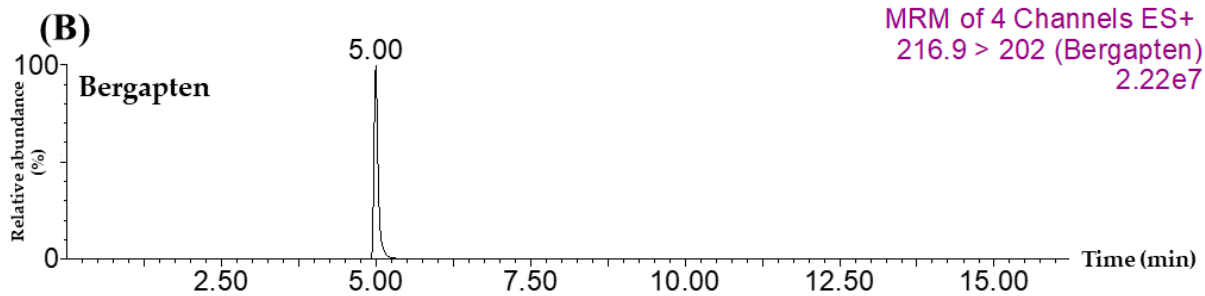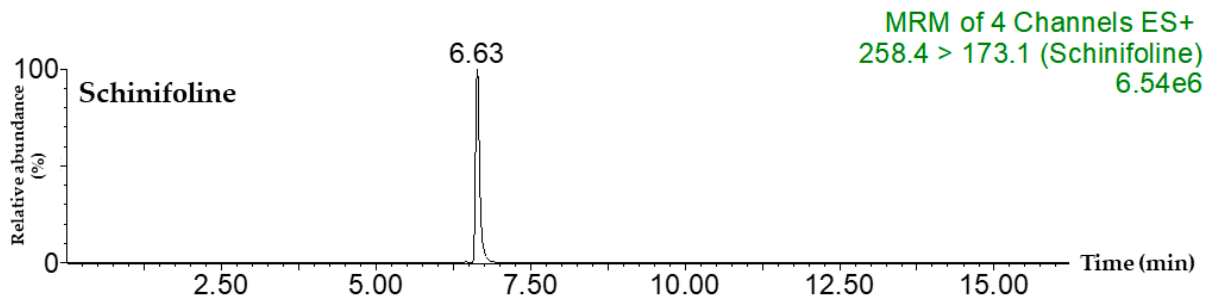



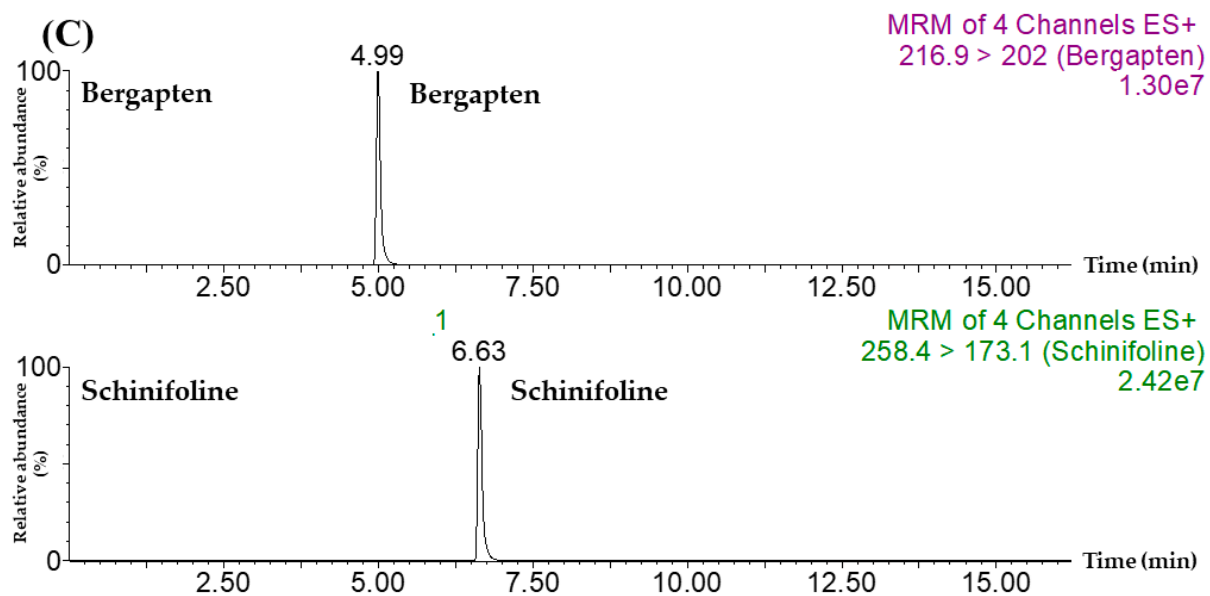

**Figure S4.** Extracted ion chromatograms for each standard marker (A), 2018ZSS sample (B), and 2021ZSS sample (C) measured by LC-MS/MS MRM mode.

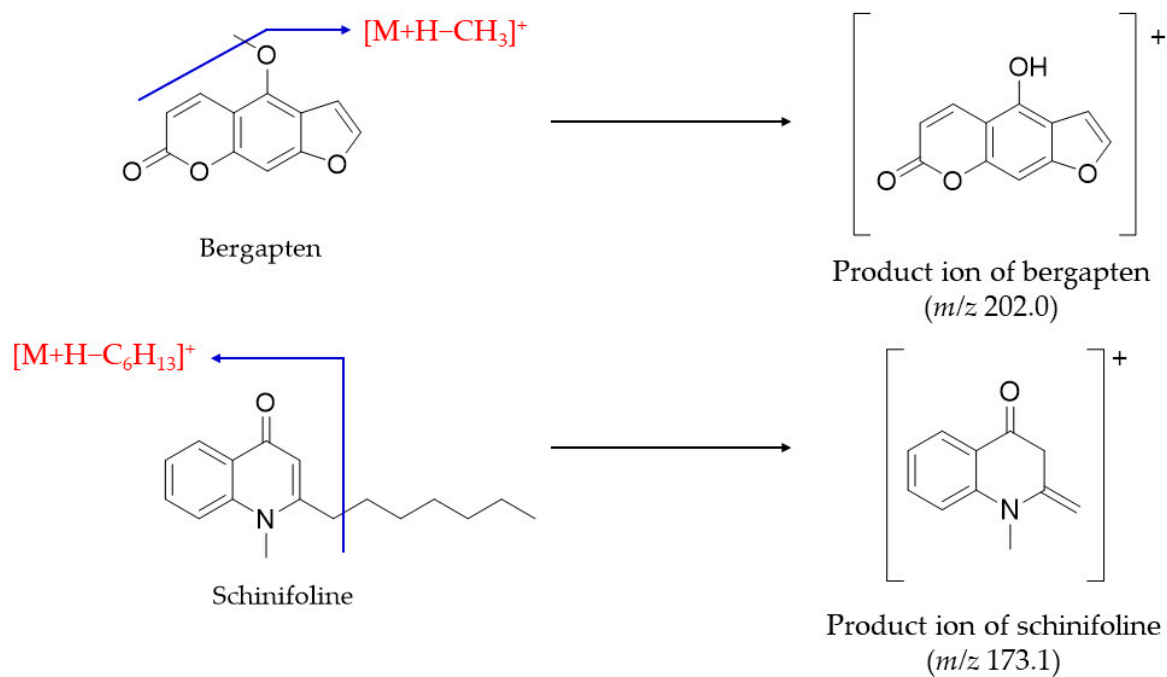

**Figure S5.** Fragmentation of the two markers by the UPLC-MS/MS MRM method.

(A)

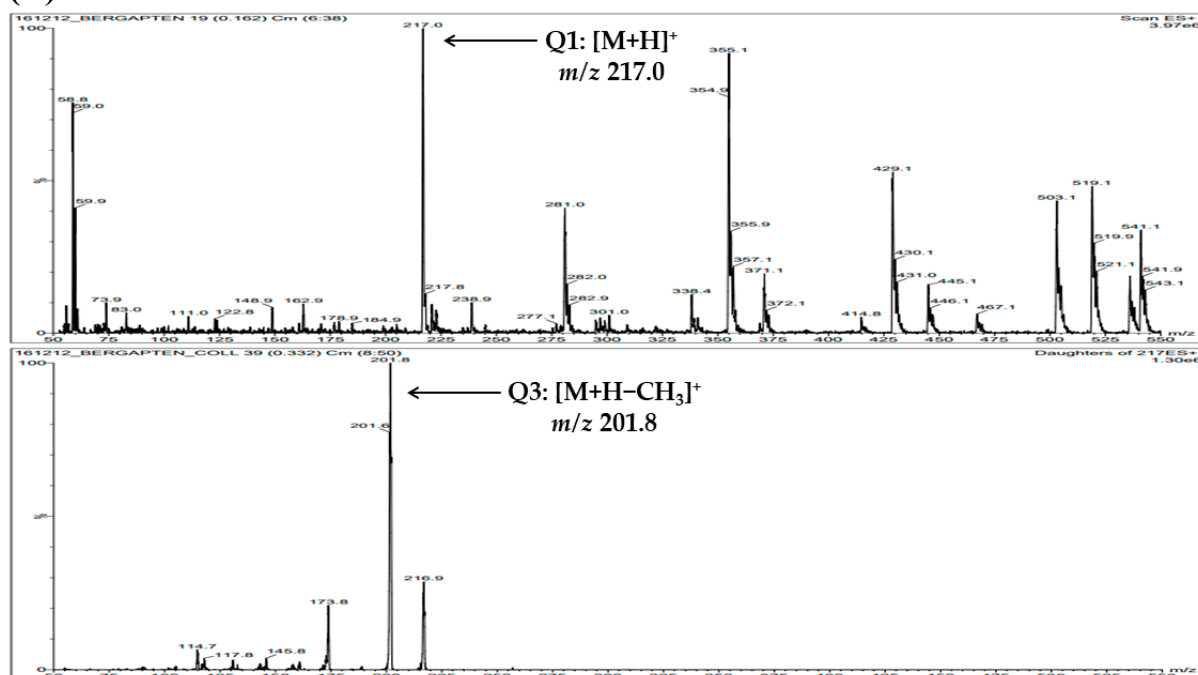

(B)

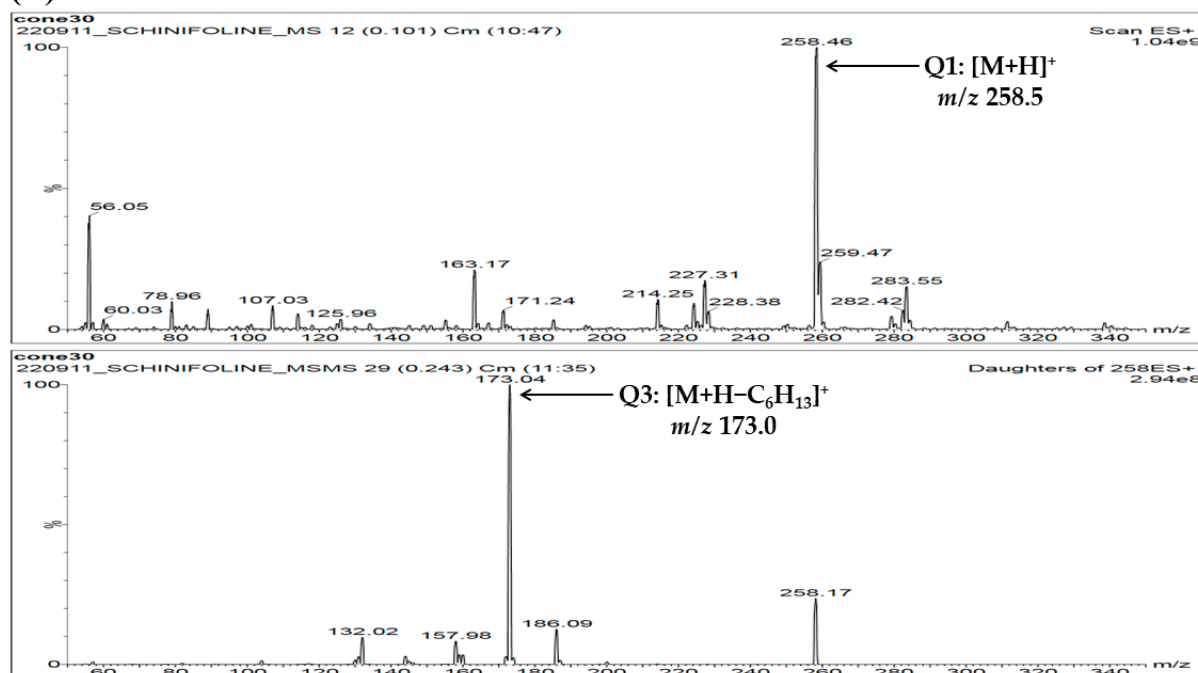

**Figure S6.** Precursor ion (Q1) and product ion (Q3) peaks of bergapten (A) and schinifoline (B) by the UPLC-MS/MS MRM method.

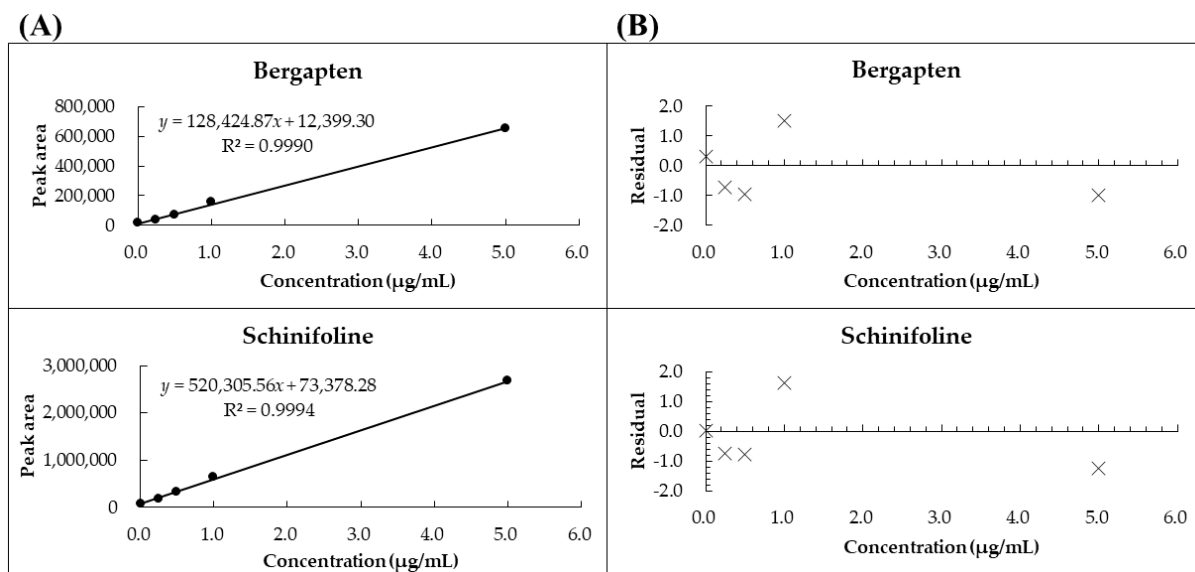

**Figure S7.** Calibration curves (A) and residual plots (B) of the two markers in UPLC–MS/MS MRM method.
